# Supplementary material for: Time Trends in Patient Characteristics and In-Hospital Adverse Events for Primary Total Knee Arthroplasty in the United States: 2010-2017
Source: PubMed Central journal article supplement — Arthroplast Today. 2021 Sep 22;11:157–62. doi: 10.1016/j.artd.2021.08.010 (PMC8473015; doi:10.1016/j.artd.2021.08.010), 2021-09-22
Supplement: mmc7.pdf [file mmc7.pdf]

# CONFLICT OF INTEREST STATEMENT

## *American Association of Hip and Knee Surgeons*

(Adopted from the American Academy of Orthopaedic Surgeons disclosure statement)

The following form **must be filled out completely and submitted by each author (example, 6 authors, 6 forms).**  
**All items require a response. If there is no relevant disclosure for a given item, enter "None."**

**Manuscript Title:** Time Trends in Patient Characteristics and In-Hospital Adverse Events for Primary Total Knee Arthroplasty in the United States: 2010-2017

1. Royalties from a company or supplier (The following conflicts were disclosed)
2. Speakers bureau/paid presentations for a company or supplier (The following conflicts were disclosed)
- 3A. Paid employee for a company or supplier (The following conflicts were disclosed)
- 3B. Paid consultant for a company or supplier (The following conflicts were disclosed)
- 3C. Unpaid consultants for a company or supplier (The following conflicts were disclosed)
4. Stock or stock options in a company or supplier (The following conflicts were disclosed)
5. Research support from a company or supplier as a Principal Investigator (The following conflicts were disclosed)
6. Other financial or material support from a company or supplier (The following conflicts were disclosed)
7. Royalties, financial or material support from publishers (The following conflicts were disclosed)
8. Medical/Orthopaedic publications editorial/governing board (The following conflicts were disclosed)  
Journal of Bone and Joint Surgery, Arthroplasty Today
9. Board member/committee appointments for a society (The following conflicts were disclosed)  
American Orthopaedic Association

**Each author must sign AND print or type his/her name, date and submit a separate form**

In addition, one BLINDED Conflict of Interest form (no author names used) should be submitted per manuscript with all author disclosures.

Mohamad Halaw  
Author Name (Print or Type)

Moham  
Author Signature

3-30-21  
Date
